# Supplementary material for: Influence of Age of Infection on the Gut Microbiota in Worker Honey Bees (Apis mellifera iberiensis) Experimentally Infected with Nosema ceranae
Source: MDPI journal article supplement (doi:10.3390/microorganisms12040635), 2024-03-22
Supplement: s1 [file s1]

**Table S1.** GenBank (NCBI) accession numbers for primer and probe design for the detection and quantification of *Bombella apis*.

| Species             | Access Number                                                                                                                                                                                                                                                                        |
|---------------------|--------------------------------------------------------------------------------------------------------------------------------------------------------------------------------------------------------------------------------------------------------------------------------------|
| <i>P. apium</i>     | NZ_CP020554.1; NR_133042.1; KM014167.1;<br>KM014144.1; MH205731.1; KT598292.1;<br>NZ_LMYI01000023.1; NZ_LMYJ01000028.1;<br>NZ_LMYH01000022.1; MEJG01000010.1.                                                                                                                        |
| <i>S. floricola</i> | KJ638086.1                                                                                                                                                                                                                                                                           |
| <i>Bo. apis</i>     | NR_157653.1; KU534110.1; MN582688.1;<br>NZ_JAGJTM010000006.1; NZ_JAGJTM010000001.1;<br>NZ_JAGJTM010000002.1;<br>NZ_JADAQV010000006.1; NZ_WHNS01000003.1;<br>NZ_JAGJTM010000005.1; NZ_WHNS01000007.1;<br>NZ_WHNS01000005.1; NZ_WHNS01000002.1;<br>CP046394.1; MT787561.1; MT787560.1. |
