# Supplementary material for: Influence of Age of Infection on the Gut Microbiota in Worker Honey Bees (Apis mellifera iberiensis) Experimentally Infected with Nosema ceranae
Source: MDPI journal article supplement (doi:10.3390/microorganisms12040635), 2024-03-22
Supplement: s1 [file s1]

**Table S2.** The gBlock® Gene Fragment ordered for the bacterial 16S rRNA gene and the *Apis mellifera* COI gene. The primers (red) and the probes (blue) annealing regions are indicated in bold and underlined.

| Bacteria                                                            | Sequence gBlock® Gene Fragment (5' to 3')                                                                                                                                                                                                                                                                                                                                                                                                                                                                                                                                                                                    | Size (pb) |
|---------------------------------------------------------------------|------------------------------------------------------------------------------------------------------------------------------------------------------------------------------------------------------------------------------------------------------------------------------------------------------------------------------------------------------------------------------------------------------------------------------------------------------------------------------------------------------------------------------------------------------------------------------------------------------------------------------|-----------|
| <i>Frischella perrara</i><br>(16S rRNA,<br>NR_118490.1)             | AGATTAGCTAGTTGGTGGGGTAAAGGCTCACCAAG<br>GCGACGATCTCTAGCTGGTCTGAGAGGATGACCAG<br>CCACACTGGAAGTGAACACCGTCCAGACTCCTAC<br>GGGAGGCAGCAGTGGGGAATATTGCACAATGGGG<br>GAAACCCTGATGCAGCCATGCCGCGTGTATGAAGA<br>AGGCCTTAGGGTTGTAAAGTACTTTCGGTGATGA <b><u>G</u></b><br><b><u>GAAGTTATGTGTGGGATAAGC</u></b> ACATATAATTGAC<br>GTTAGTTACAGAAGAAGCACCGGCTAACTCCGTGC<br>CAGCAGCCCGCGTAATACGGAGGGTGCGAGCGTTA<br>ATCGGAATGACTGGGCGTAAAGGGCATGTAGGCGG<br>ATGATTAAGTTAGGTGTGAAAGCCT <b><u>CGGGCTCAAC</u></b><br><b><u>CTGAGAATAG</u></b> CATTTAAACTGGTGATCTGGAGTA<br>CTGTAGAGGGAGGTAGAATTCCACGTGTAGCGGTG<br>AAATGCGTAGAGATGTGGAGGAATACCGGTGGCGA<br>AG | 490       |
| <i>Gilliamella apicola</i><br>(16S rRNA,<br>NR_121727.1)            | GCACAAGCGGTGGAGCATGTGGTTTAATTTCGATGC<br>AACGCGAAGAACCCTTACCTGGTCTTGACATCCACA<br>GAATCTTGCAGAGATGCGGGAGTGCCTTCGGGAAC<br>TGTGAGACAGGTGCTGCATGGCTGTCGTCAGCTCGT<br>GTTGTGAAATGTTGGGTTAAGTCCCGCAACGAGCG<br>CAACCCTTATC <b><u>CTTTGTTGCCATCGGTTAGGCC</u></b> GG<br>GAACTCAAAGGAGACTGCCGTTGATAAAGCGGAGG<br>AAGGTGGGGACGACGTCAAGTCATCATGGCCCTTA<br>CGACCAGGGCTACACACGTGCTACAATGGCGTATA<br>CAAAGGGAGGCGA <b><u>CCTCGCGAGAGCAAGCGG</u></b> AC<br>CTCATAAAGTACGTCTAAGTCCGGATTGGAGTCTGC<br>AACTCGACTCCATGAAGTCGGAATCGCTAGTAATC<br>GTGAATCAGAATGTCACGGTGAATACGTTCCCGGG<br>CCTTGTACACACCGCCCGTCACACCATGGGAG                                | 487       |
| <i>Snodgrassella alvi</i><br>(16S rRNA,<br>NR_122055.1)             | AACGATGACAATTAGCTGTTGGGACACTAGATGTCT<br>TAGTAGCGAAGCTAACGCGTGAAATTGTCCGCCTG<br>GGGAGTACGGTCGCAAGATTAATACTCAAAGGAAT<br>TGACGGGGACCCGCACAAGCGGTGGATGATGTGGA<br>TTAATTCGATGCAACGCGAAGAACCTTACCTGGTCT<br>TGACATGTACGGAATCT <b><u>CTTAGAGATAGGAGAGT</u></b><br><b><u>GCCTT</u></b> CGGGAACCGTAACACAGGTGCTGCATGGCT<br>GTCGTCAGCTCGTGTGCTGAGATGTTGGGTTAAGTC<br>CCGCAACGAGCGCAACCC <b><u>TTGTCATTAGTTGCCAT</u></b><br><b><u>CATTAAGTT</u></b> GGGCACTCTAATGAGACTGCCGGTGA<br>CAAACCGGAGGAAGGTGGGGATGACGTCAAGTCCT<br>CATGGCCCTTATGACCAGGGCTTACACGTCATACA<br>ATGGTCGGTACAGAGGGTAGCGAAGCCGCGAGGTG<br>AAGCCAATCTCAGAAAGCCGATCGTAGTCCG     | 489       |
| <i>Bifidobacterium<br/>asteroides</i><br>(16S rRNA,<br>NR_044154.1) | AACAC <b><u>ATGCAAGTCGAACGGGATCC</u></b> GGGCAGCTT<br>GCTGCCTGGTGAGAGTGGCGAACGGGTGAGTAATG<br>CGTGACCAACCTGCCCCATGCTTCGGAATAGCTCCT<br>GGAAACGGGTGTAATGCCGGATGCTCCGCACCGT                                                                                                                                                                                                                                                                                                                                                                                                                                                      | 500       |

|                                                                     |                                                                                                                                                                                                                                                                                                                                                                                                                                                                                                                                                                                                                        |     |
|---------------------------------------------------------------------|------------------------------------------------------------------------------------------------------------------------------------------------------------------------------------------------------------------------------------------------------------------------------------------------------------------------------------------------------------------------------------------------------------------------------------------------------------------------------------------------------------------------------------------------------------------------------------------------------------------------|-----|
|                                                                     | <p>CGCATGATGGTGTGGGAAA<u>GGGTTTACCGGCATG</u><br/> <u>GGATG</u>GGGTTCGCTCCTATCAGCTTGTTGGCGGG<br/> TGATGGCCTGCCAAGGCTTCGACGGGTAGCCGGCC<br/> TGAGAGGGCGACCGGCCACATTGGGACTGAGATAC<br/> GGCCCAGACTCCTACGGGAGGCAGCAGTGGGGAAT<br/> ATTGCACAATGGGCGCAAGCCTGATGCAGCGACGC<br/> CGCGTGCGGGATGACGGCCTTCGGGTTGTAAACCG<br/> CTTTTGATTGGGAGCAAGCGAGAGTGAGTGTACCTT<br/> TCGAATAAGCACCGGCTAACTACGTGCCAGCAGCC<br/> CGGTAATACGTAGGGTGCAAGCGTTATCCGGATTT<br/> ATTGGGCGT</p>                                                                                                                                                                |     |
| <i>Bombilactobacillus mellis</i><br>(16S rRNA,<br>NR_126249.1)      | <p>TGCA<u>AGTCGAGCGCGGGAAGTCA</u>GGGAAGCCTTC<br/> GGGTGGAACCTGGTGGAAACGAGCGGCGGATGGGTGA<br/> GTAACACGTAGGTAACCTGCCCTAAAGCGGGGGAT<br/> ACCATCTGGAAACAGGTGCTAATACCGCATAAACC<br/> CAGCAGTCACATG<u>AGTGCTGGTTGAAAGACGGCT</u><br/> TCGGCTGTCACTTTAGGATGGACCTGCGGCGTATTA<br/> GCTAGTTGGTGGAGTAACGGTTCACCAAGGCGATG<br/> ATACGTAGCCGACCTGAGAGGGTAATCGGCCACAT<br/> TGGGACTGAGACACGGCCCCAACTCCTACGGGAGG<br/> CAGCAGTAGGGAATCTTCCACAATGGACGCAAGTC<br/> TGATGGAGCAACGCCGCGTGGATGAAGAAGGTCTT<br/> CGGATCGTAAAATCCTGTTGTTGAAGAAGAACGGT<br/> TGTGAGAGTAACTGCTCATAGCGTGACGGTAATCA<br/> ACCAGAAAGTCACGGCTAACTACGTGCCAGCAGCC<br/> GC</p> | 491 |
| <i>Lactobacillus helsingborgensis</i><br>(16S rRNA,<br>NR_126253.1) | <p>TGCAAGTCGAGCGAGCAATTTTGACGGAATACTTC<br/> GGTAGGAAAGTCAGAAGCGCGAGCGGCGGATGGGT<br/> GAGTAACACGTGG<u>GCAACCTGCCCTTTAGCTTGGG</u><br/> ATACCACTTGGAACAGGTGCTAATACCAAATAAG<br/> CAGCACGAGCGCATGCTCGAGCTGAGAAAGGCGG<br/> CTTTCGA<u>GCTGTCACTAAAGGATGGGC</u>CCGCGGT<br/> GCATTAGCTAGTTGGAAGGTAACGGCTTACCAAG<br/> GCGATGATGCATAGCCGAGTTGAGAGACTGACCGG<br/> CCACATTGGGACTGAGACACGGCCCCAACTCCTAC<br/> GGGAGGCAGCAGTAGGGAATCTTCCACAATGGACG<br/> CAAGTCTGATGGAGCAACGCCGCGTGAGTGAAGAA<br/> GGTTTTCGGATCGTAAAGCTCTGTTGTTGGTGAAGA<br/> AGGACAAGGGTAGTAACTGATTCTTGTGTTGACGGTA<br/> ATCAACCAGAAAGTCACGGCTAACTACGTGCCAGC<br/> AG</p>   | 491 |
| <i>Bartonella apis</i><br>(16S rRNA,<br>NR_126253.1)                | <p>AAGCCAAAATCAAATTTTCAACTTGAGAGTTTGATC<br/> CTGGCTCAGAACGAACGCTGGCGGCAGGCTTAACA<br/> CATGCAAGTCGAACGCACTTTTCGGAGTGAGTGGC<br/> AGACGGGTGAGTAACGC<u>GTGGGAATCTACCTATT</u><br/> <u>TCTACG</u>GAATAACGCAGAGAAATTTGTGCTAATAC<br/> CGTATACGTCCTTCGGGAGAAAGATTTATCG<u>GAGA</u><br/> <u>TAGATGAGCCCGCGTT</u>GGATTAGCTAGTTGGTGAG<br/> GTAATGGCCACCAAGGCGACGATCCATAGCTGGT<br/> CTGAGAGGATGACCAGCCACATTGGGACTGAGACA<br/> CGGCCAGACTCCTACGGGAGGCAGCAGTGGGGAA</p>                                                                                                                                                                  | 471 |

|                                                                          |                                                                                                                                                                                                                                                                                                                                                                                                                                                                                                                                                                                                                               |     |
|--------------------------------------------------------------------------|-------------------------------------------------------------------------------------------------------------------------------------------------------------------------------------------------------------------------------------------------------------------------------------------------------------------------------------------------------------------------------------------------------------------------------------------------------------------------------------------------------------------------------------------------------------------------------------------------------------------------------|-----|
|                                                                          | <p>TATTGGACAATGGGCGCAAGCCTGATCCAGCCATG<br/> CCGCGTGAGTGATGAAGGCCCTAGGGTTGTAAAGC<br/> TCTTTCACCGGTGAAGATAATGACGGTAACCGGAG<br/> AAGAAGCCCCGGCTAA</p>                                                                                                                                                                                                                                                                                                                                                                                                                                                                            |     |
| <p><i>Bombella apis</i><br/> (16S rRNA,<br/> NR_147774.1)</p>            | <p>AAGATGATGACGGTACCTAGAGAAGAAGCCCCGG<br/> CTAACTTCGTGCCAGCAGCCGCGGTAATACGAAGG<br/> GGGCTAGCGTTGCTCGGAATGACTGGGCGTAAAGG<br/> GCGCGTAGGCTGTCTGTACAGTCAGATGTGAAATCC<br/> CCGGGCTTAACCTGGGAACTGCATTTGATACGTGCA<br/> GACTAGAGT<u>CCGAGAGAGGGTTGTGGAATT</u>CCCA<br/> <u>GTGTAGAGGTGAAATTC</u>GT<u>AGATATTGGGAAGA</u><br/> <u>ACACCG</u>GTTGCGAAGGCGGCAACCTGGCTCGGAAC<br/> TGACGCTGAGGCGCGAAAAGCGTGGGGAGCGAACA<br/> GGATTAGATACCCTGGTAGTCCACGCTGTAAACGAT<br/> GTGTGCTGGATGTTGGGTGATTTTATCATTCACTGTC<br/> GGAGCTAACGCGTTAAGCACACCGCCTGGGGAGTA<br/> CGGCCGCAAGGTTGAAACTCAAAGGAATTGACGGG<br/> GGCCCCGACAAGCGGTGGAGCATGTGGTTTAATTC</p>  | 490 |
| <p><i>Apis mellifera</i><br/> (citocrome oxidase I,<br/> OM203346.1)</p> | <p>GTTATACCATTTTAAATTGGAGGATTTGGAAATTGG<br/> CTTATTCCTTTAATACTAGGATCACCTGATATAGCA<br/> TTCCCCGAATAAATAATATTAGATTTTGATTACTTC<br/> CTCCCTCATTATTTATACTTTTATTAAGAAATTTATTT<br/> TA<u>TCCAAGACCAGGA</u><u>ACTGGAT</u>GAACAGTATATC<br/> CACCATTATCAGCATATTTATATCATTCTTCACCTTC<br/> AGTAGATTTTGCAATT<u>TTTTCTCTTCATATATCAGG</u><br/> <u>AATTCCT</u>CAATTATAGGATCATTAACTTAATAGT<br/> TACAATTATAATAATAAAAAATTTTCTATAAATTA<br/> TGACCAAATTTCAATTATTTCCATGATCAGTTTTTATT<br/> ACAGCAATTTTATTAATTATATCATTACCTGTATTAG<br/> CTGGAGCAATTACTATACTATTATTTGATCGAAATT<br/> TTAATACATCATTTTTCGATCCTATAGGAGGTGGAG<br/> ATCCAATTCTTTATCAACATTTA</p> | 495 |
